# Supplementary material for: Rapid telomere motions in live human cells analyzed by highly time-resolved microscopy
Source: Springer Nature journal article supplement (doi:10.1186/1756-8935-1-4), 2008-10-27

One second intervals

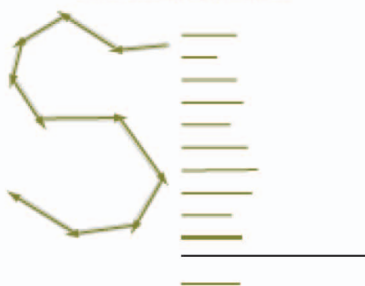

Two second intervals

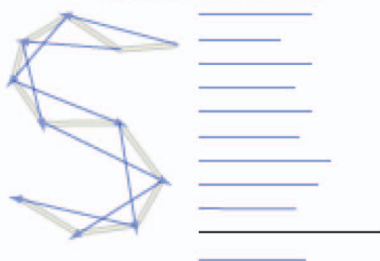

Three second intervals

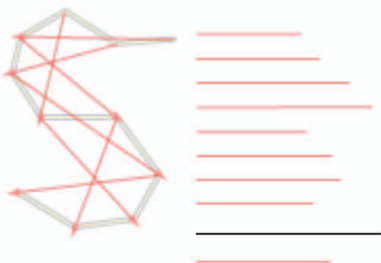

Four second intervals

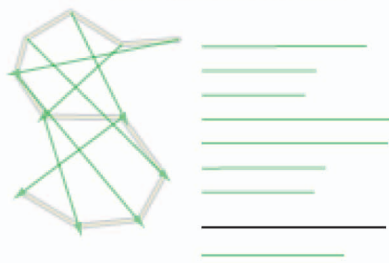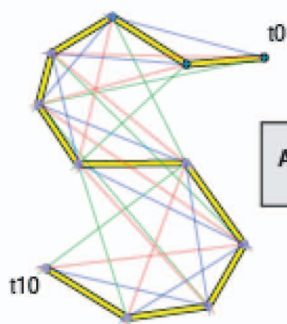

Averages:

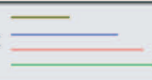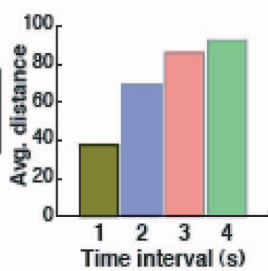

Supplement: Additional file 9 [file 1756-8935-1-4-s9.pdf]
