# Supplementary material for: Rapid telomere motions in live human cells analyzed by highly time-resolved microscopy
Source: Springer Nature journal article supplement (doi:10.1186/1756-8935-1-4), 2008-10-27

### Komolgorov-Smirnov nonparametric comparison between histograms

|                                                                       |               |
|-----------------------------------------------------------------------|---------------|
| Parental telomeres and lentiviral-vector control telomeres            | 0.013 ± 0.031 |
| Parental telomeres and azide-treated telomeres                        | 0.076 ± 0.026 |
| Parental telomeres and heterochromatin spots                          | 0.517 ± 0.029 |
| Lentiviral-vector control telomeres and WT-hTER treated telomeres     | 0.199 ± 0.027 |
| Lentiviral-vector control telomeres and 47A MT-hTer treated telomeres | 0.269 ± 0.025 |

K-S score between histograms



K-S error within each histogram



Supplement: Additional file 18 [file 1756-8935-1-4-s18.pdf]
