# Supplementary figures and images for: Rapid telomere motions in live human cells analyzed by highly time-resolved microscopy
Source: Springer Nature journal article supplement (doi:10.1186/1756-8935-1-4), 2008-10-27

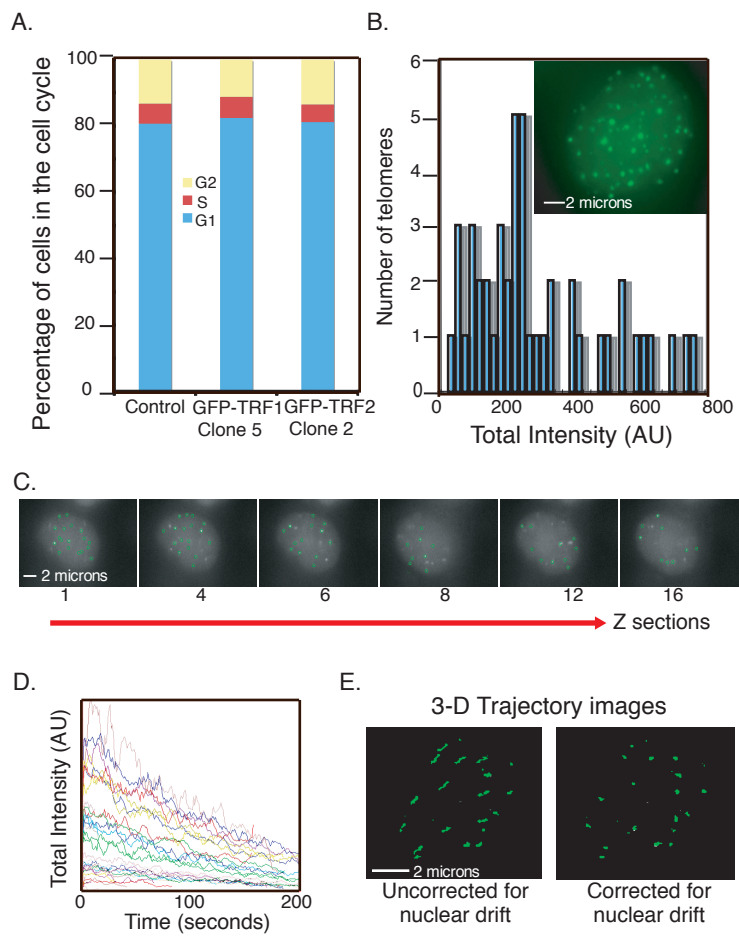

fig. S1

Supplement: Additional file 1 [file 1756-8935-1-4-s1.pdf]
